# Supplementary material
Source: publisher figshare collection journal article supplement (https://acs.figshare.com/ndownloader/files/4111522)
Supplement: Supplementary file 1 [file 4111522]

## Visualization of protein fouling inside a hollow fiber ultrafiltration membrane by fluorescent microscopy

Yan Hao, Cui Liang, Akihito Moriya, Hideto Matsuyama\*, Tatsuo Maruyama\*

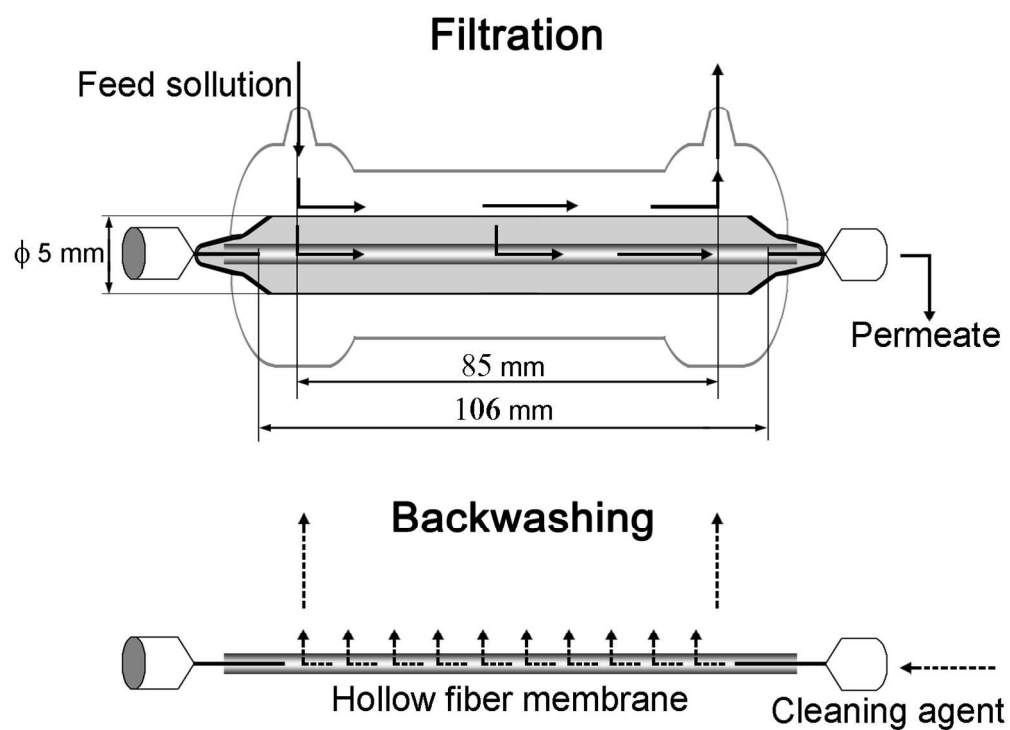

**Figure S1** Detail geometry of a laboratory-scale minimodule used for membrane filtration.

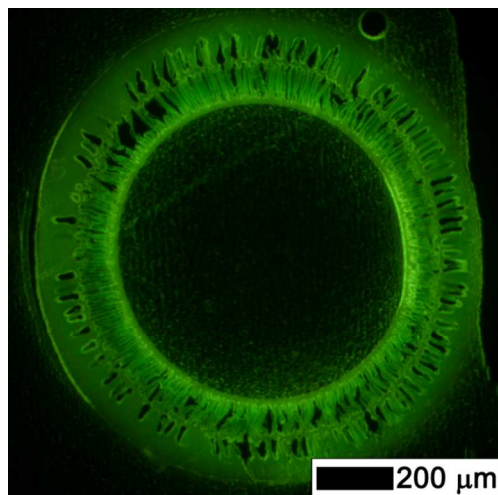

**Figure S2** Fluorescent microscope image of cross-section of the FITC-filtrated PES membrane with MWCO 30 kDa. A solution containing 26  $\mu\text{M}$  FITC, preincubated for 12 h to hydrolyze FITC, was permeated through a PES membrane with MWCO 30 kDa for 2 h.
